# Supplementary material
Source: Springer Nature journal article supplement (https://www.springermedizin.de/resource/supplementary/12943_2008_406_MOESM5_ESM.pdf/9554198)

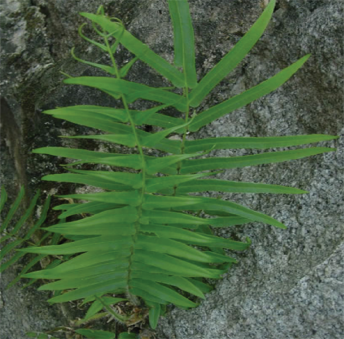

Supplement: MOESM5 [file 9554198]
